# Supplementary material for: Modulating p-AMPK/mTOR Pathway of Mitochondrial Dysfunction Caused by MTERF1 Abnormal Expression in Colorectal Cancer Cells
Source: MDPI journal article supplement (doi:10.3390/ijms232012354), 2022-10-15
Supplement: s1 [file s1]

**Table S1. Correlation analysis of MTERF1 protein expression with clinicopathological parameters in 52 colorectal cancer patients** (The bold number represents the P-values with significant differences).

| Patients characteristics | MTERF1 expression |      | $\chi^2$      | P-value       |
|--------------------------|-------------------|------|---------------|---------------|
|                          | Low               | High |               |               |
| <i>Age (years)</i>       |                   |      |               |               |
| <50                      | 10                | 10   | 0.0000, 1     | 1.0000        |
| ≥50                      | 16                | 16   |               |               |
| <i>Gender</i>            |                   |      |               |               |
| Female                   | 11                | 9    | 0.32501       | 0.5686        |
| Male                     | 15                | 17   |               |               |
| <i>Hypertension</i>      |                   |      |               |               |
| Yes                      | 7                 | 5    | 0.4331        | 0.5104        |
| NO                       | 19                | 21   |               |               |
| <i>Diabetes</i>          |                   |      |               |               |
| Yes                      | 1                 | 4    | 1.9911        | 0.1582        |
| NO                       | 25                | 22   |               |               |
| <i>Tumor size</i>        |                   |      |               |               |
| <5cm                     | 17                | 11   | 2.7861        | 0.0951        |
| ≥5cm                     | 9                 | 15   |               |               |
| <i>Lymph node status</i> |                   |      |               |               |
| 0                        | 5                 | 15   | <b>8.1251</b> | <b>0.0044</b> |
| 1-3                      | 21                | 11   |               |               |
| <i>ER expression</i>     |                   |      |               |               |
| Positive                 | 11                | 5    | 3.2501        | 0.0714        |
| Negative                 | 15                | 21   |               |               |
| <i>PR expression</i>     |                   |      |               |               |
| Positive                 | 12                | 15   | 0.69331       | 0.4050        |
| Negative                 | 14                | 11   |               |               |
| <i>Tumor status</i>      |                   |      |               |               |
| T1+T2                    | 21                | 10   | <b>9.6651</b> | <b>0.0019</b> |
| T3+T4                    | 5                 | 16   |               |               |
| <i>Nodal status</i>      |                   |      |               |               |
| N0                       | 5                 | 15   | <b>8.1251</b> | <b>0.0044</b> |
| Nx                       | 21                | 11   |               |               |
| <i>Clinical stages</i>   |                   |      |               |               |
| 1                        | 21                | 11   | <b>8.1251</b> | <b>0.0044</b> |
| 2                        | 5                 | 15   |               |               |
