# Supplementary material for: Modulating p-AMPK/mTOR Pathway of Mitochondrial Dysfunction Caused by MTERF1 Abnormal Expression in Colorectal Cancer Cells
Source: MDPI journal article supplement (doi:10.3390/ijms232012354), 2022-10-15
Supplement: s1 [file s1]

the means  $\pm$  SEM ( $n \geq 3$ ). NS represents no significant difference. \*  $P < 0.05$ , \*\*  $P < 0.01$ , \*\*\*  $P < 0.001$  by two-tailed Student's t-test.
