# Supplementary material for: Modulating p-AMPK/mTOR Pathway of Mitochondrial Dysfunction Caused by MTERF1 Abnormal Expression in Colorectal Cancer Cells
Source: MDPI journal article supplement (doi:10.3390/ijms232012354), 2022-10-15
Supplement: s1 [file s1]

Table S2. Sequences of primers used in qPCR

| Gene            | Primer | Nucleotide sequences          |
|-----------------|--------|-------------------------------|
| <i>GAPDH</i>    | F      | 5'-ACAACCTTTGGTATCGTGGAAGG-3' |
|                 | R      | 5'-GCCATCACGCCACAGTTTC-3'     |
| <i>ND1</i>      | F      | 5'-ATGGCCAACCTCCTACTCCT-3'    |
|                 | R      | 5'-GCGGTGATGTAGAGGGTGAT-3'    |
| <i>ND6</i>      | F      | 5'-CCACAGCACCAATCCTACCT-3'    |
|                 | R      | 5'-TGATTGTTAGCGGTGTGGTC-3'    |
| <i>TFAM</i>     | F      | 5'-GGCACAGGAAACCAGTTAGG-3'    |
|                 | R      | 5'-CAGAACACCGTGGCTTCTAC-3'    |
| <i>Cytb</i>     | F      | 5'-AACCGCCTTTTCATCAATCG-3'    |
|                 | R      | 5'-TAGCGGATGATTCAGCCATAATT-3' |
| <i>12S rRNA</i> | F      | 5'-AAACTGCTCGCCAGAACACT-3'    |
|                 | R      | 5'-CATGGGCTACACCTTGACCT-3'    |
| <i>16S rRNA</i> | F      | 5'-CACTGTCAACCCAACACAGG-3'    |
|                 | R      | 5'-GGCAGGTCAATTTCACTGGT-3'    |
| <i>NDUFB8</i>   | F      | 5'-CCGCCAAGAAGTATAATATGCGT-3' |
|                 | R      | 5'-TATCCACACGGTTCCTGTTGT-3'   |
| <i>18S rDNA</i> | F      | 5'- CGCGCTCTACCTTACCTACC-3'   |
|                 | R      | 5'- CCGTCGGCATGTATTAGCTC-3'   |
| <i>D-loop</i>   | F      | 5'- GGGAACGTGTGGGCTATTTA-3'   |
|                 | R      | 5'- TACTCAAATGGGCCTGTCCT-3'   |
